# Supplementary material for: Liposomal encapsulation of Chenopodium berlandieri extracts rich in oleanolic acid: improved bioactivities targeting metabolic syndrome prevention
Source: Royal Society of Chemistry journal article supplement (doi:10.1039/d5fo01572c), 2025-01-01
Supplement: d5fo01572c1.pdf [file d5fo01572c1.pdf]

Supplementary material 1. Concentration of OA and its saponins in Huauzontle extracts.

| Type of extract    | Oleanolic acid saponins<br>(mg/g Huauzontle) | Oleanolic acid<br>(mg/g Huauzontle) | Total OA<br>(saponins + sapogenin)<br>(mg/g Huauzontle) |
|--------------------|----------------------------------------------|-------------------------------------|---------------------------------------------------------|
| Extract            | 5.40 ± 0.04 <sup>a</sup>                     | 2.02 ± 0.00 <sup>b</sup>            | 7.42 ± 0.04 <sup>a</sup>                                |
| Hydrolyzed extract | 0.48 ± 0.04 <sup>b</sup>                     | 6.60 ± 0.65 <sup>a</sup>            | 7.08 ± 0.61 <sup>a</sup>                                |

Results expressed as mean ± SD. Oleanolic acid.
