# Supplementary material for: Liposomal encapsulation of Chenopodium berlandieri extracts rich in oleanolic acid: improved bioactivities targeting metabolic syndrome prevention
Source: Royal Society of Chemistry journal article supplement (doi:10.1039/d5fo01572c), 2025-01-01
Supplement: d5fo01572c3.pdf [file d5fo01572c3.pdf]

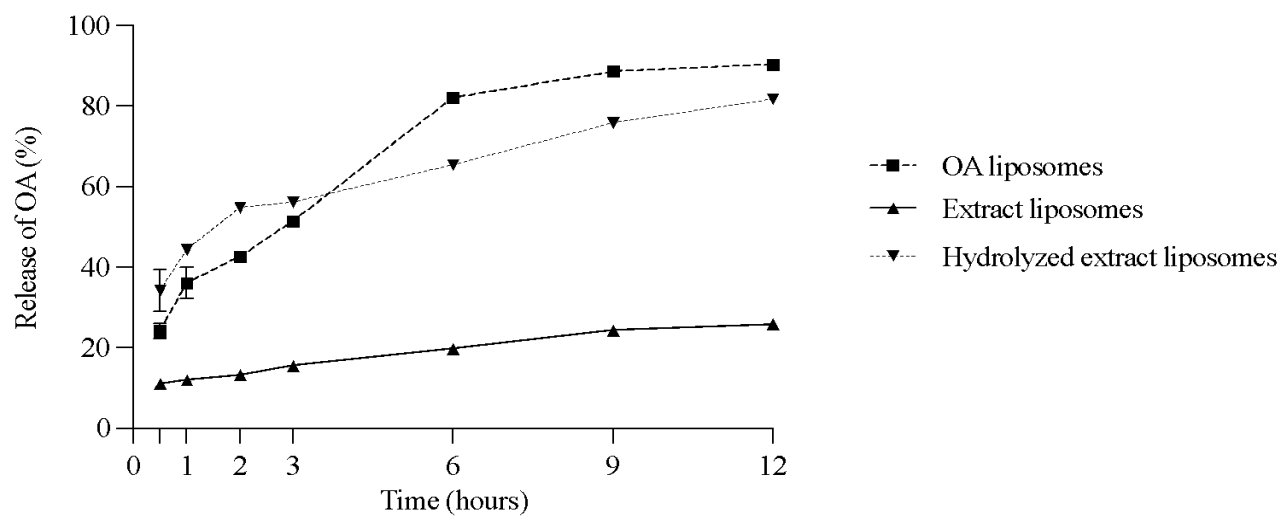

Supplementary material 3. *In vitro* OA release from liposomal systems. Values expressed as mean  $\pm$  standard deviation. OA: Oleanolic acid.
