# Supplementary material for: Liposomal encapsulation of Chenopodium berlandieri extracts rich in oleanolic acid: improved bioactivities targeting metabolic syndrome prevention
Source: Royal Society of Chemistry journal article supplement (doi:10.1039/d5fo01572c), 2025-01-01
Supplement: d5fo01572c4.pdf [file d5fo01572c4.pdf]

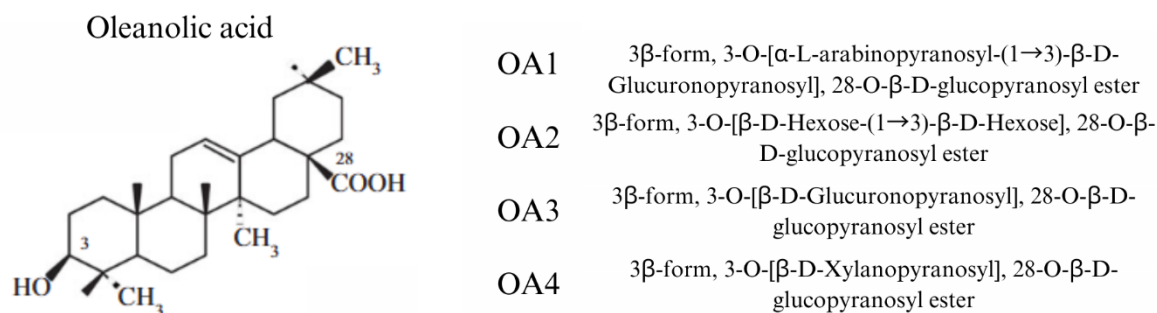

Supplementary material 4. Saponins chemical structures determined after HPLC-MS-TOF analysis of *C. berlandieri* seeds.
